# Supplementary material for: Focusing by shape change in the lens of the eye: a commentary on Young (1801) ‘On the mechanism of the eye’
Source: PubMed Central journal article supplement (PMC4360117; doi:10.1098/rstb.2014.0308), 2015-04-19

PHILOSOPHICAL  
TRANSACTIONS:

---

## The Bakerian Lecture: On the Mechanism of the Eye

Thomas Young

*Phil. Trans. R. Soc. Lond.* 1801 **91**, doi: 10.1098/rstl.1801.0004, published 1 January 1801

---

### References

**Article cited in:**

<http://rstl.royalsocietypublishing.org/content/91/23.citation#related-urls>

### Email alerting service

Receive free email alerts when new articles cite this article - sign up in the box at the top right-hand corner of the article or click [here](#)

Fig. 1.

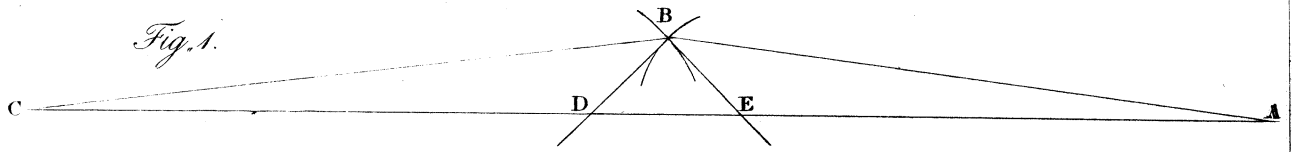

Fig. 2.

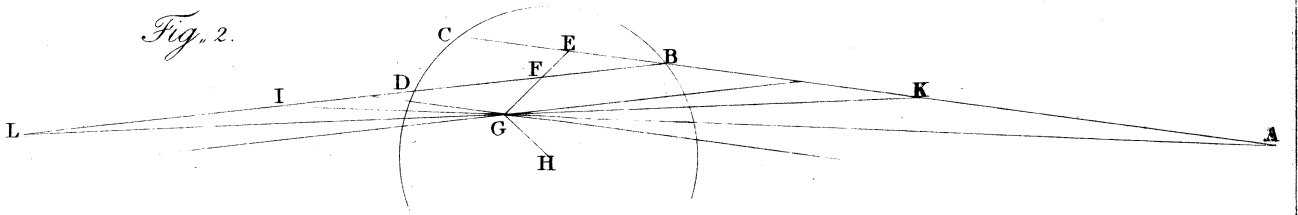

Fig. 3.

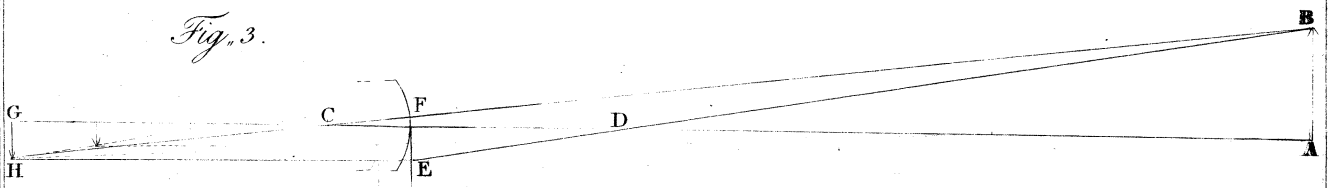

Fig. 4.

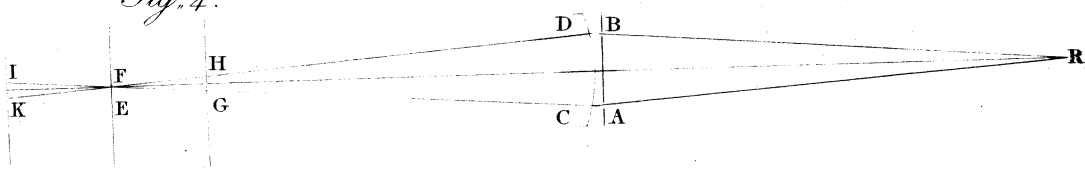

Fig. 5.

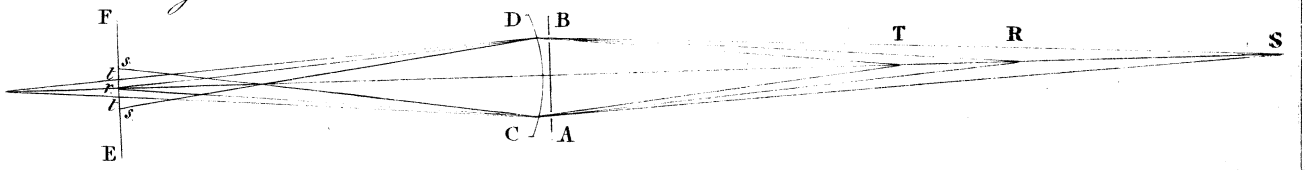

Fig. 6.

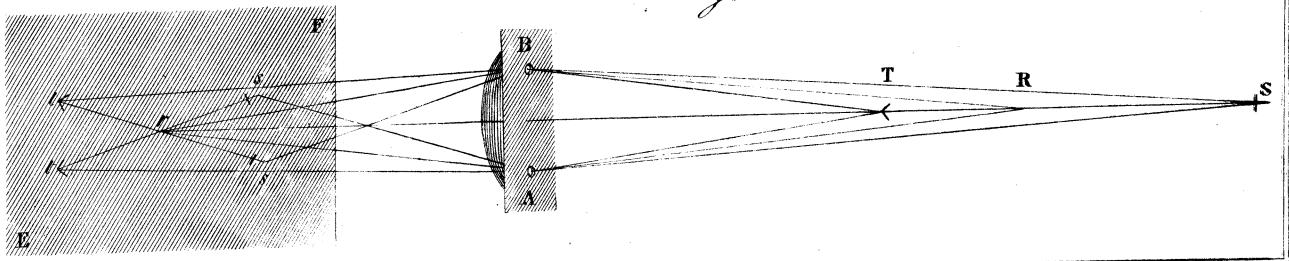

|      |   |
|------|---|
| 8    | 7 |
| .8   |   |
| .7   |   |
| .6   |   |
| .5   |   |
| .4   |   |
| .3   |   |
| .2   |   |
| .1   |   |
| 0    |   |
| 10   |   |
| 20   |   |
| 30   |   |
| 40   |   |
| 50   |   |
| 60   |   |
| 70   |   |
| 80   |   |
| 90   |   |
| 100  |   |
| 110  |   |
| 120  |   |
| 130  |   |
| 140  |   |
| 150  |   |
| 160  |   |
| 170  |   |
| 180  |   |
| 190  |   |
| 200  |   |
| 210  |   |
| 220  |   |
| 230  |   |
| 240  |   |
| 250  |   |
| 260  |   |
| 270  |   |
| 280  |   |
| 290  |   |
| 300  |   |
| 310  |   |
| 320  |   |
| 330  |   |
| 340  |   |
| 350  |   |
| 360  |   |
| 370  |   |
| 380  |   |
| 390  |   |
| 400  |   |
| 410  |   |
| 420  |   |
| 430  |   |
| 440  |   |
| 450  |   |
| 460  |   |
| 470  |   |
| 480  |   |
| 490  |   |
| 500  |   |
| 510  |   |
| 520  |   |
| 530  |   |
| 540  |   |
| 550  |   |
| 560  |   |
| 570  |   |
| 580  |   |
| 590  |   |
| 600  |   |
| 610  |   |
| 620  |   |
| 630  |   |
| 640  |   |
| 650  |   |
| 660  |   |
| 670  |   |
| 680  |   |
| 690  |   |
| 700  |   |
| 710  |   |
| 720  |   |
| 730  |   |
| 740  |   |
| 750  |   |
| 760  |   |
| 770  |   |
| 780  |   |
| 790  |   |
| 800  |   |
| 810  |   |
| 820  |   |
| 830  |   |
| 840  |   |
| 850  |   |
| 860  |   |
| 870  |   |
| 880  |   |
| 890  |   |
| 900  |   |
| 910  |   |
| 920  |   |
| 930  |   |
| 940  |   |
| 950  |   |
| 960  |   |
| 970  |   |
| 980  |   |
| 990  |   |
| 1000 |   |

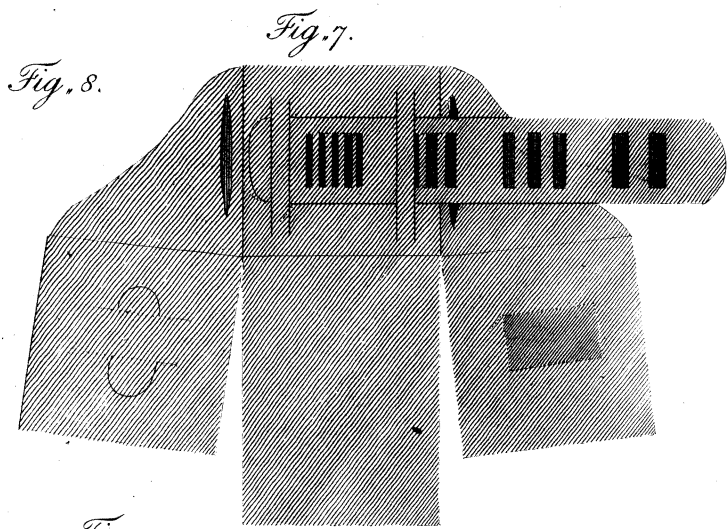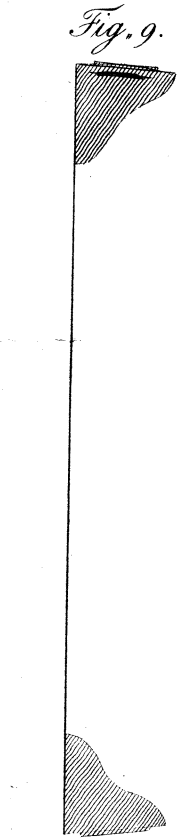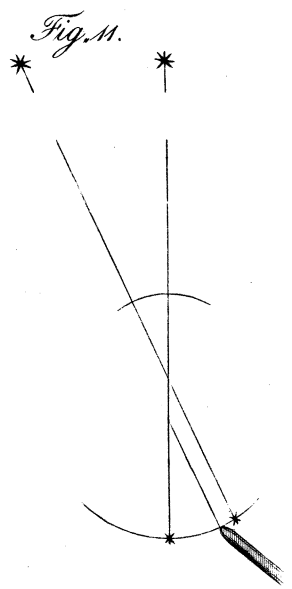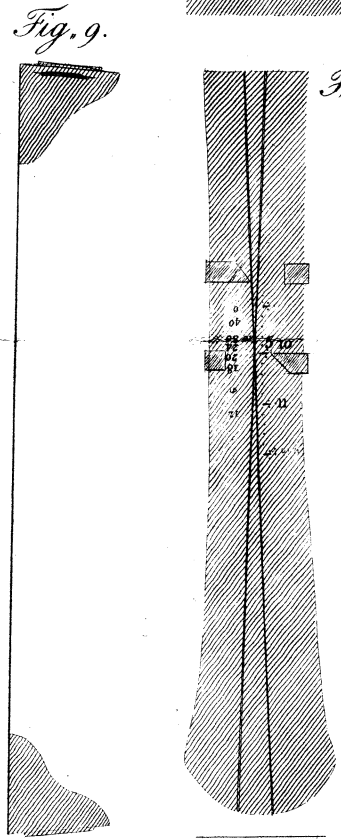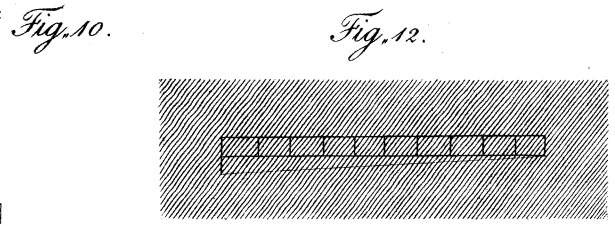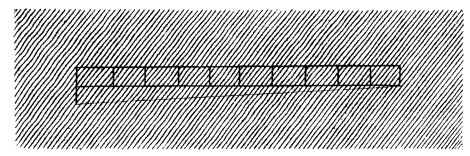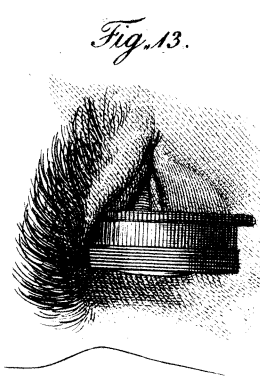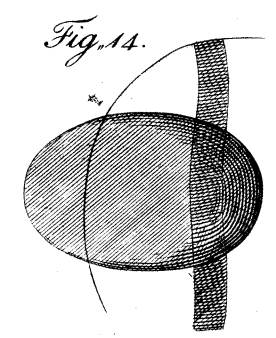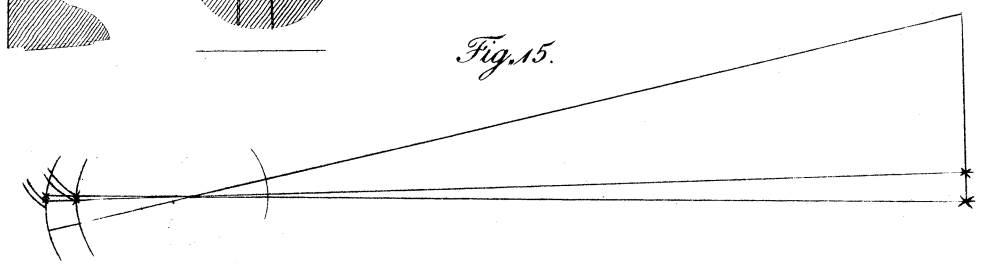

*Fig. 16.*

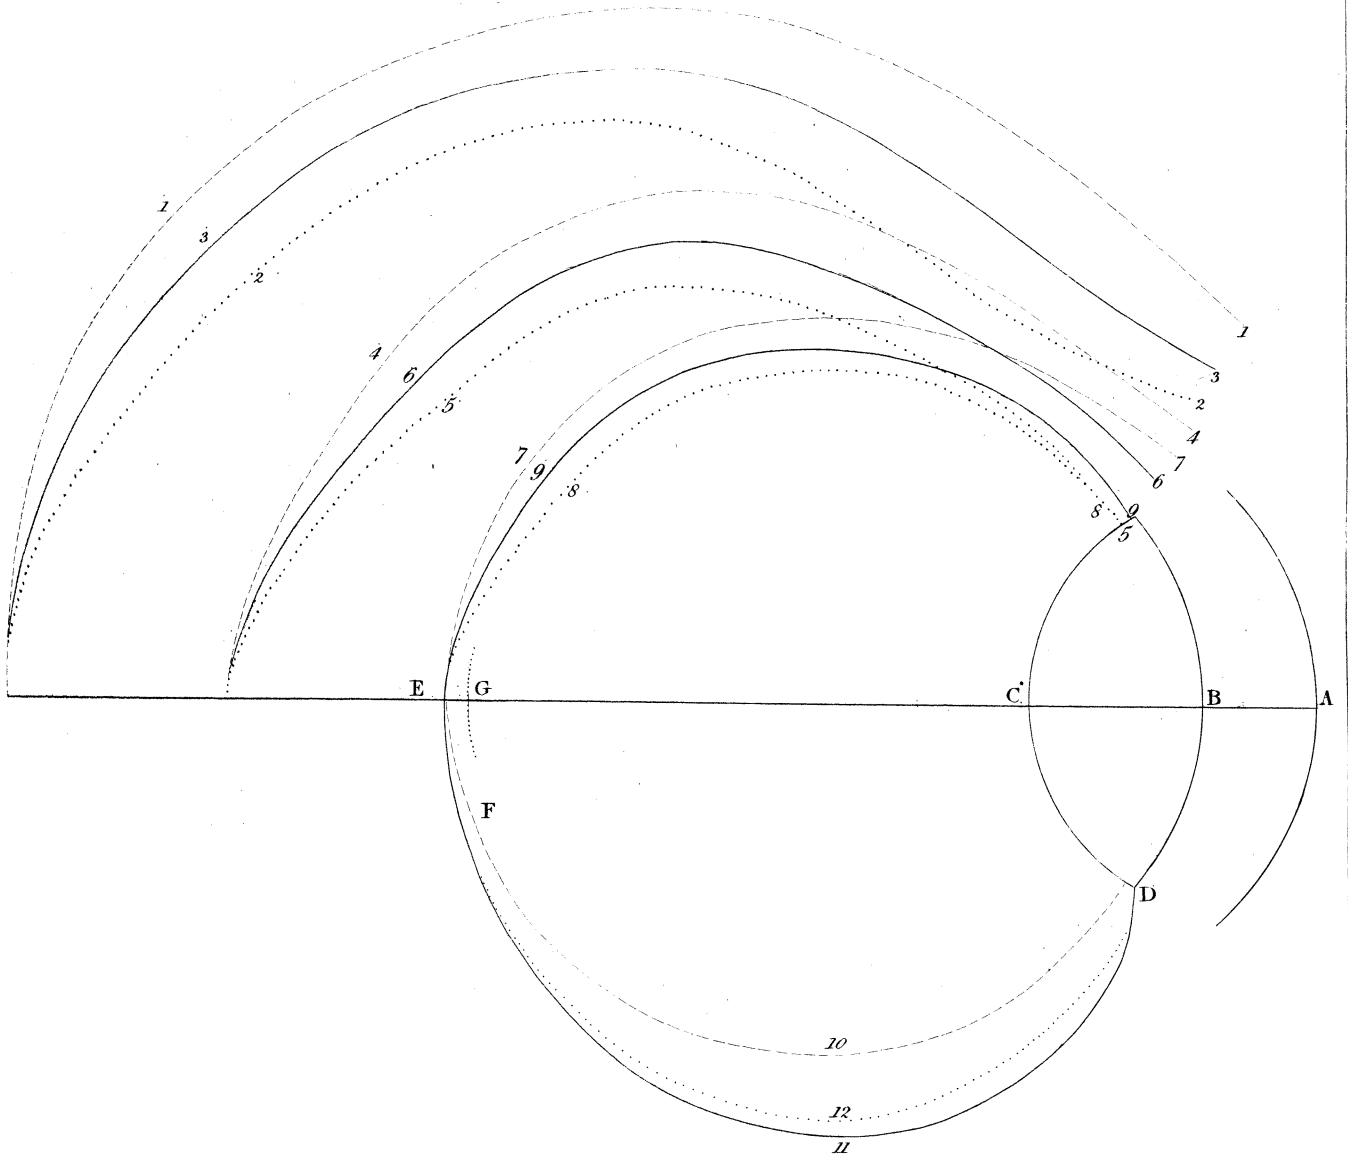

Fig. 17.

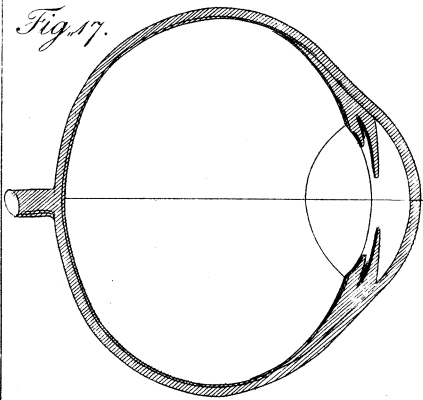

Fig. 18.

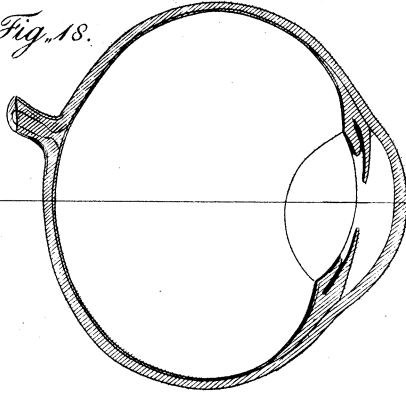

Fig. 19.

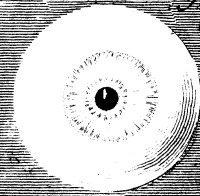

Fig. 20.

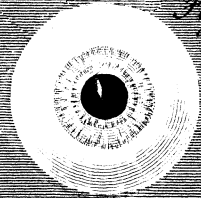

Fig. 21.

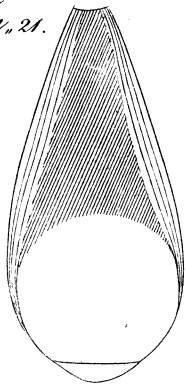

Fig. 22.

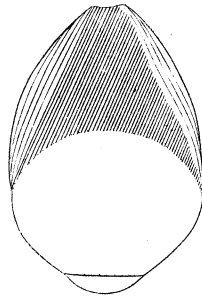

Fig. 25.

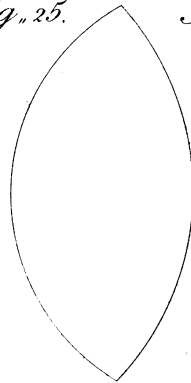

Fig. 23.

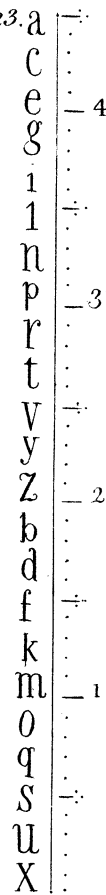

Fig. 24.

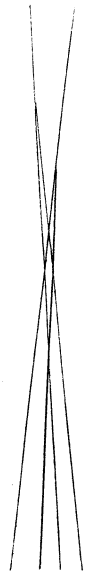

Fig. 27.

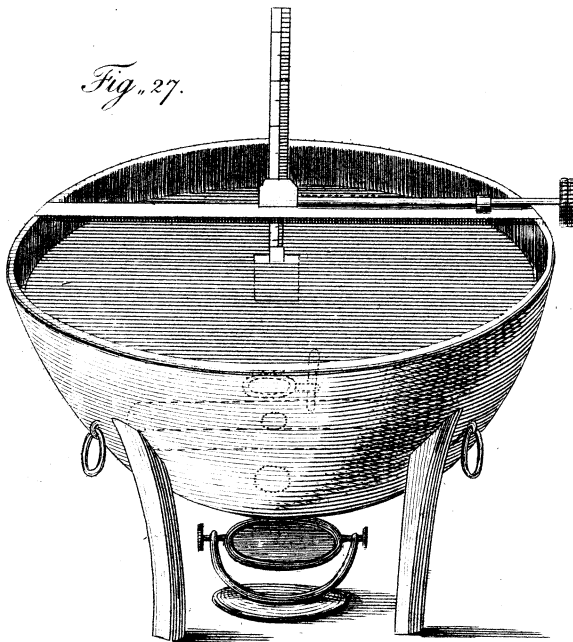

Fig. 26.

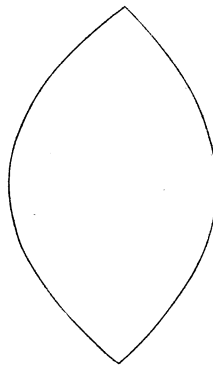

28

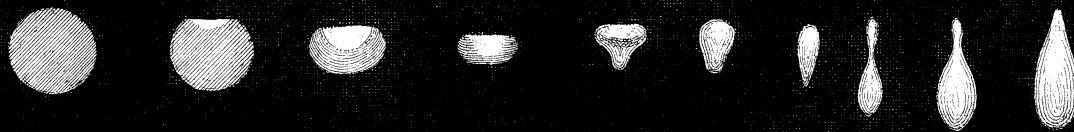

29

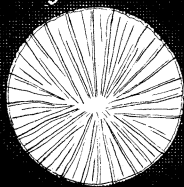

30

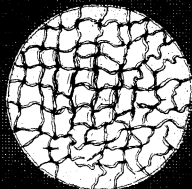

31

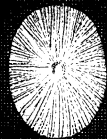

32

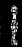

33

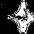

34

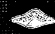

35

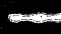

36

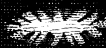

37

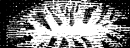

38

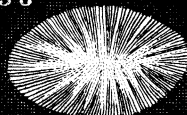

39

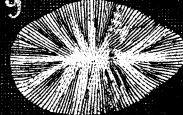

40

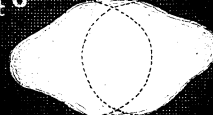

41

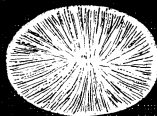

42

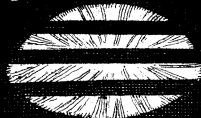

43

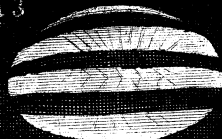

44

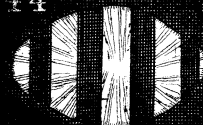

45

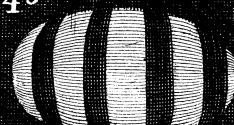

Fig. 46.

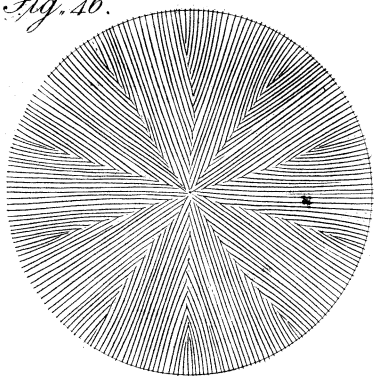

Fig. 47.

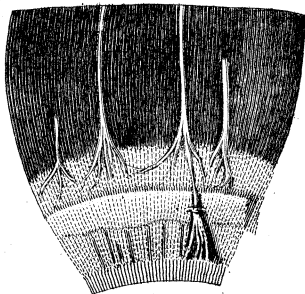

Fig. 50.

Fig. 48.

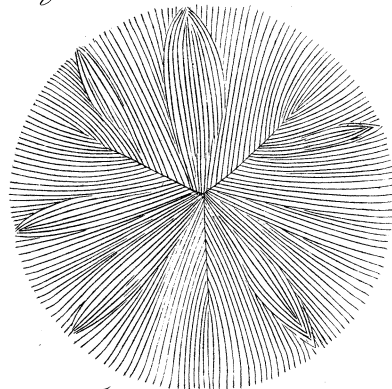

Fig. 49.

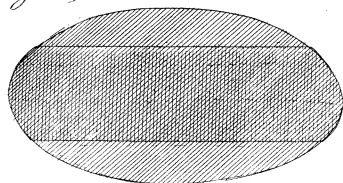

Fig. 51.

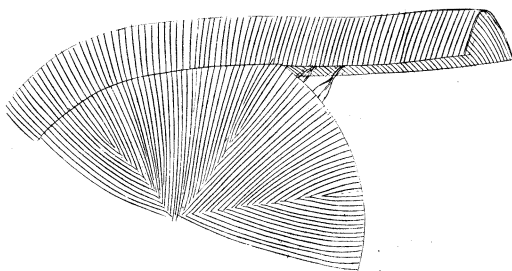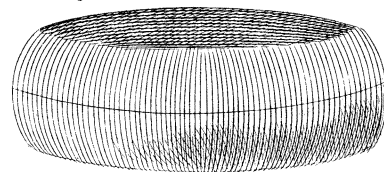

*Fig 52.*

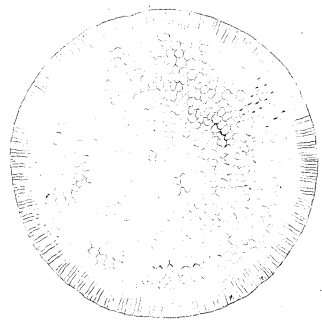

*Fig 53.*

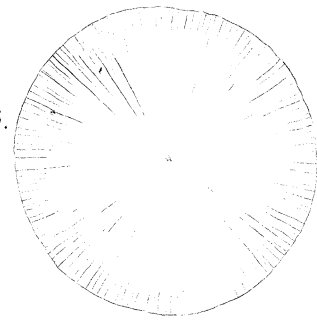

*Fig 54.*

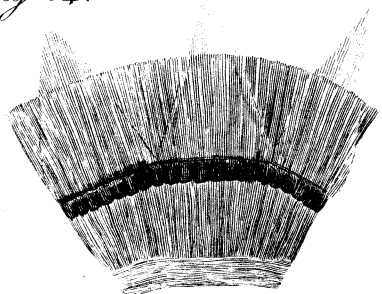

*Fig 55.*

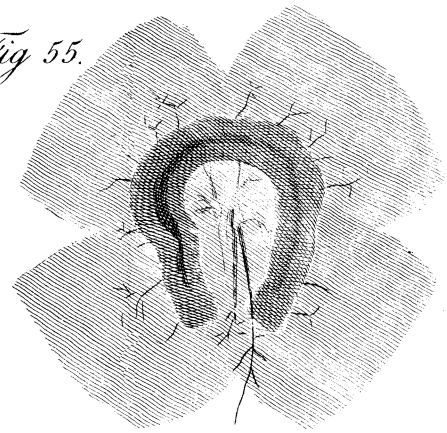

*Fig 56.*

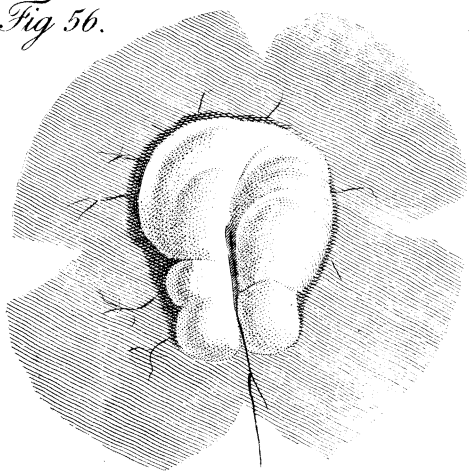

*Fig 57.*

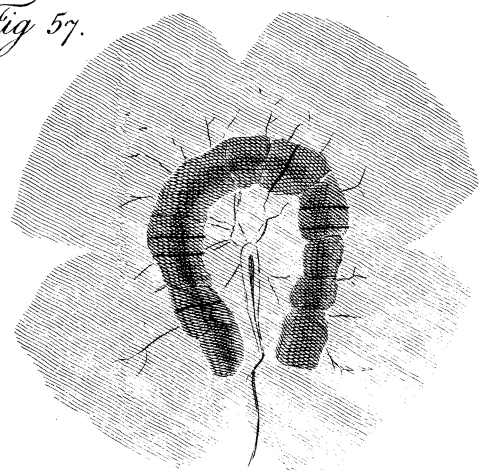

Supplement: rstb20140308supp1.pdf [file rstb20140308supp1.pdf]
